# Supplementary material for: A New Highlight of Ephedra alata Decne Properties as Potential Adjuvant in Combination with Cisplatin to Induce Cell Death of 4T1 Breast Cancer Cells In Vitro and In Vivo
Source: PubMed Central journal article supplement (PMC7072491; doi:10.3390/cells9020362), 2020-02-04

Supplementary Figure 1

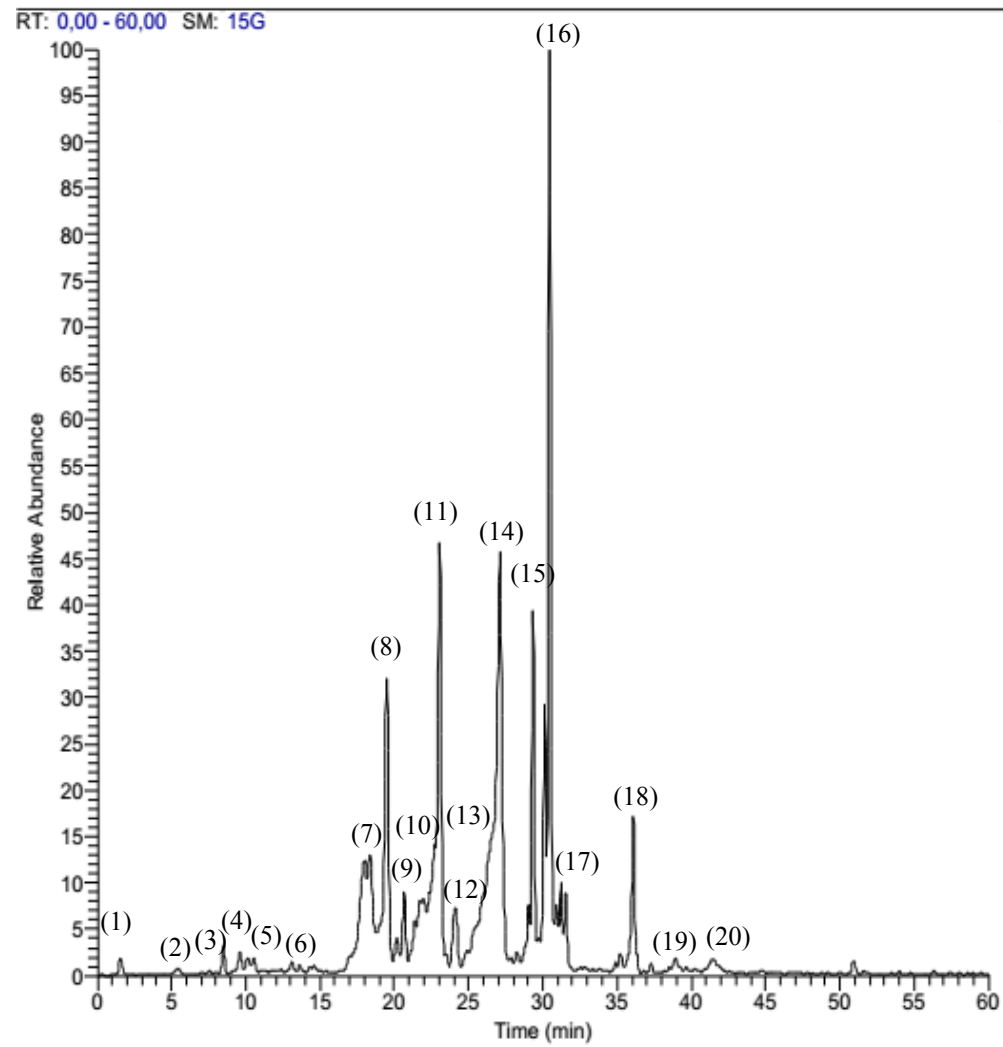

**Supplementary Table I. Summary of the properties of the compounds detected in an *Ephedra alata* extract of by LC-MS/MS.**

| <b>Peak</b> | <b>RT<br/>(min)</b> | <b>[M+H]-<br/>(m/Z)</b> | <b>HPLC ms2</b>             | <b>Identified compounds</b>                                      |
|-------------|---------------------|-------------------------|-----------------------------|------------------------------------------------------------------|
| <b>1</b>    | 1.51                | 377                     | 341, 215, 179, 332          | Caffeic acid derivative                                          |
| <b>2</b>    | 5.22                | 191                     | 173, 111, 129               | Citric acid                                                      |
| <b>3</b>    | 8.45                | 359                     | 197, 182,167                | Syringic acid hexoside                                           |
| <b>4</b>    | 9.54                | 197                     | 182, 167,153                | Syringic acid                                                    |
| <b>5</b>    | 10.52               | 305                     | 179, 219, 261, 105, 137,125 | Gallocatechin                                                    |
| <b>6</b>    | 13.65               | 193                     | 149, 178,134                | Ferulic acid                                                     |
| <b>7</b>    | 18.39               | 625                     | 463 ,301                    | Quercetin dihexoside                                             |
| <b>8</b>    | 19.38               | 593                     | 473, 503. , 353, 575 , 383  | Vicenin-2                                                        |
| <b>9</b>    | 22.18               | 463                     | 300                         | Quercetin-3-O-galactoside                                        |
| <b>10</b>   | 22.43               | 609                     | 489, 447                    | Isoorientin-4 -O-glucoside                                       |
| <b>11</b>   | 23.21               | 641                     | 479, 317                    | 6-Hydroxyquercetin-3-O-di-hexose                                 |
| <b>12</b>   | 24.86               | 463                     | 301,343                     | Quercetin 3-O-glucoside                                          |
| <b>13</b>   | 25.5                | 447                     | 285                         | Luteolin-8-C-β-D-glucopyranoside (Orientin)                      |
| <b>14</b>   | 26.65               | 301                     | 301                         | Quercetin                                                        |
| <b>15</b>   | 29.43               | 479                     | 317                         | Myricetin hexoside                                               |
| <b>16</b>   | 30.45               | 607                     | 463 , 301, 505, 545         | Quercetin 3-O-[6"-(3-hydroxyl-3-methylglutaryl)-β-D-galactoside] |
| <b>17</b>   | 30 .93              | 479                     | 317,313 ,151 ,179           | Myricetin-3-O-glucoside                                          |
| <b>18</b>   | 36.13               | 756                     | 593, 594                    | Unknown                                                          |
| <b>19</b>   | 38 .9               | 593                     | 301,300, 447                | Quercetin 3-O-rhamnoside 7-O-rhamnoside                          |
| <b>20</b>   | 42.9                | 577                     | 431,285                     | Kaempferol-O-di-deoxyhexoside                                    |

**Supplementary Table II. Antibodies used in the study**

| <b>Antibodies</b>               | <b>Providers</b> | <b>Number</b> | <b>Isotype</b> | <b>Dilution</b> | <b>Molecular weight (kDa)</b> |
|---------------------------------|------------------|---------------|----------------|-----------------|-------------------------------|
| <b>PARP</b>                     | Cell signaling   | #9532         | Rabbit         | 1:1000          | 116,89                        |
| <b>Procaspace3</b>              | Cell signaling   | #9661         | Rabbit         | 1:1000          | 19,17                         |
| <b>Procaspace 7</b>             | Cell signaling   | #12827        | Rabbit         | 1:1000          | 35,20                         |
| <b>Procaspace 8</b>             | Cell signaling   | #4927         | Rabbit         | 1:1000          | 10,57                         |
| <b>Procaspace 9</b>             | Cell signaling   | #9508         | Mouse          | 1:1000          | 49,37,35                      |
| <b>BOK</b>                      | Cell signaling   | #4521         | Rabbit         | 1:1000          | 22                            |
| <b>Bak</b>                      | Cell signaling   | #12105        | Rabbit         | 1:1000          | 25                            |
| <b>Bax</b>                      | Cell signaling   | #14796        | Rabbit         | 1:1000          | 20                            |
| <b>Bid</b>                      | Cell signaling   | #2003         | Rabbit         | 1:1000          | 22                            |
| <b>Bcl2</b>                     | Cell signaling   | #3489         | Rabbit         | 1:1000          | 26                            |
| <b>Bcl-xl</b>                   | Cell signaling   | #2764         | Rabbit         | 1:1000          | 30                            |
| <b>Smac/Diablo</b>              | Cell signaling   | #15801        | Rabbit         | 1:1000          | 21                            |
| <b>Cytochrome c</b>             | Cell signaling   | #12963        | Mouse          | 1:1000          | 14                            |
| <b>CoxIV</b>                    | Cell signaling   | #11967        | Rabbit         | 1:1000          | 17                            |
| <b>HSC70</b>                    | Cell signaling   | #4872         | Rabbit         | 1:1000          | 70                            |
| <b><math>\beta</math>-actin</b> | Cell signaling   | #3700         | Rabbit         | 1:1000          | 42                            |
| <b>Anti-mouse IgG HRP</b>       | Sigma Aldrich    | 71045-M       | Goat           | 1 : 3000        |                               |
| <b>Anti-rabbit IgG HRP</b>      | Cell signaling   | #7076         | Goat           | 1 : 3000        |                               |

## Supplementary Figure 2. ESI-MS/MS profiles of identified compounds

### Caffeic acid derivative at [M - H]<sup>-</sup> 377

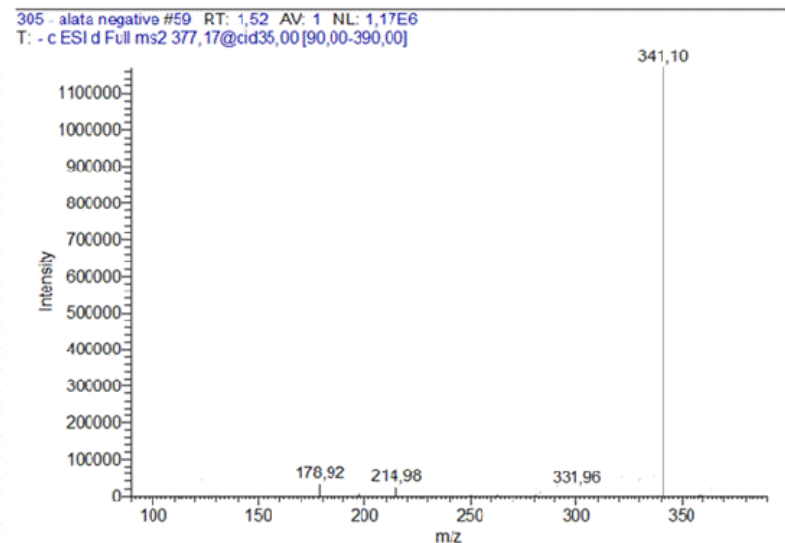

### Citric acid at [M - H]<sup>-</sup> 191

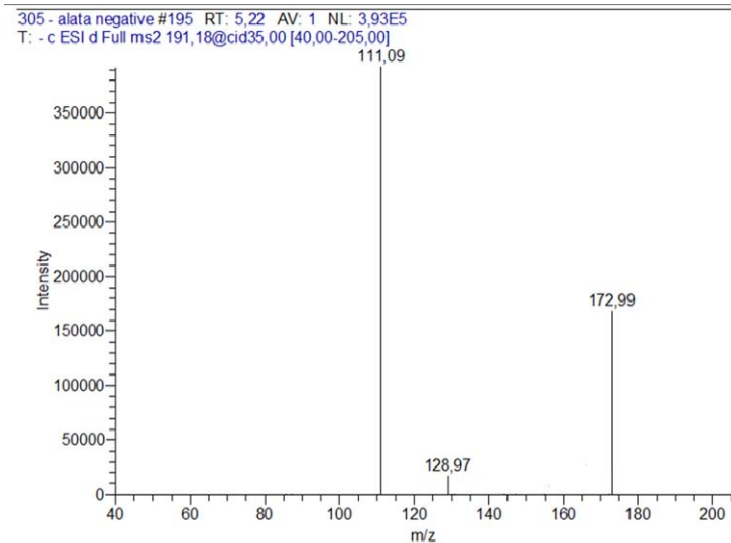

### Syringic acid hexoside at [M - H]<sup>-</sup> 359

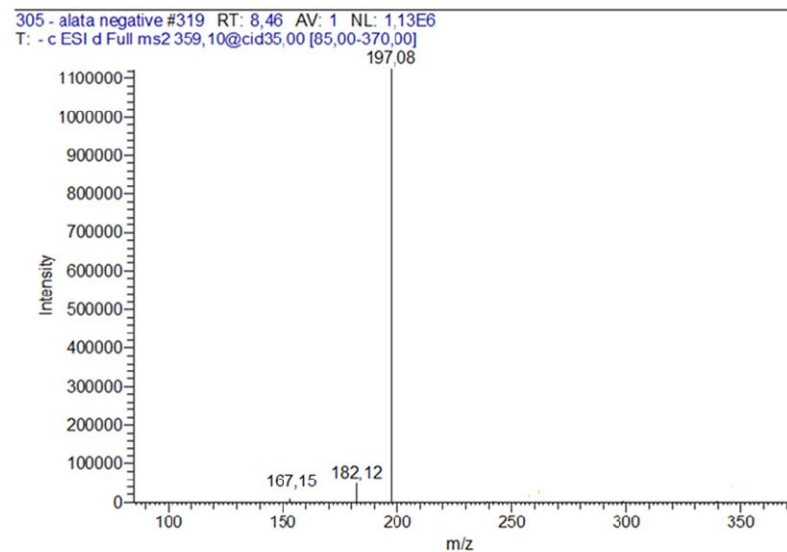

### Syringic acid at [M - H]<sup>-</sup> 197

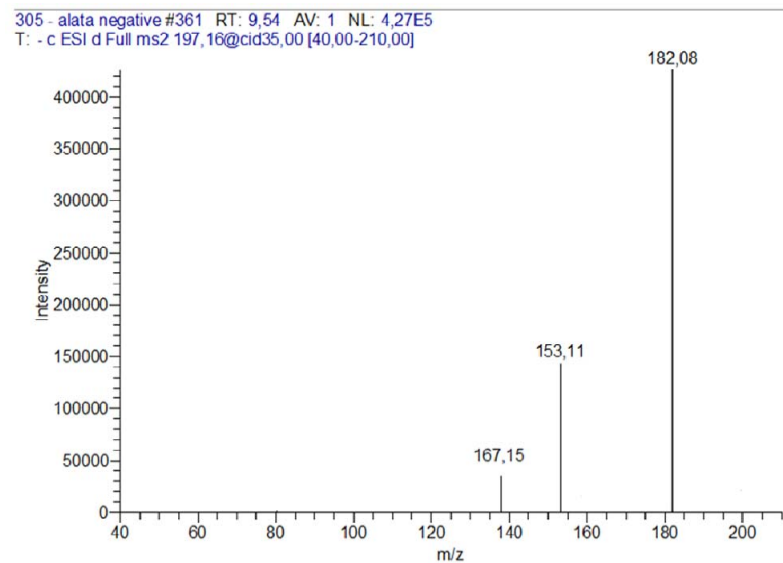

## Supplementary Figure 2. ESI-MS/MS profiles of identified compounds-Continued

### Galocatechin at [M - H]<sup>-</sup> 305

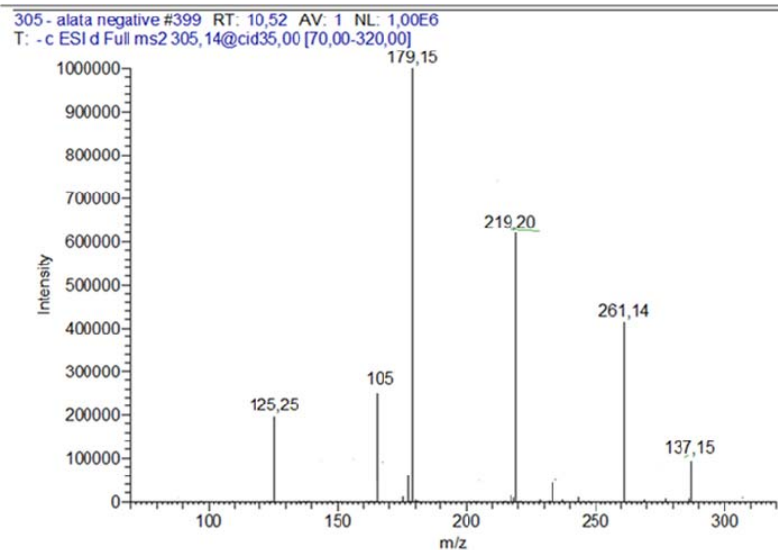

### Ferulic acid at [M - H]<sup>-</sup> 193

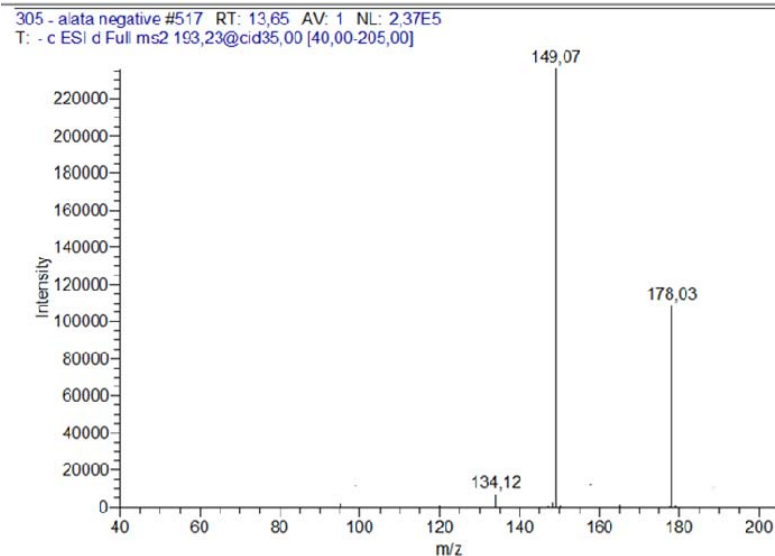

### Quercetin dihexoside at [M - H]<sup>-</sup> 625

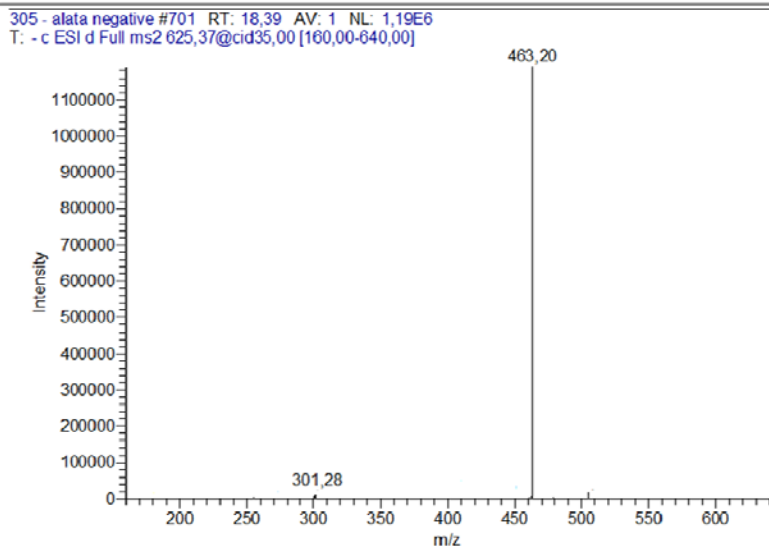

### Vicenin-2 at [M - H]<sup>-</sup> 593

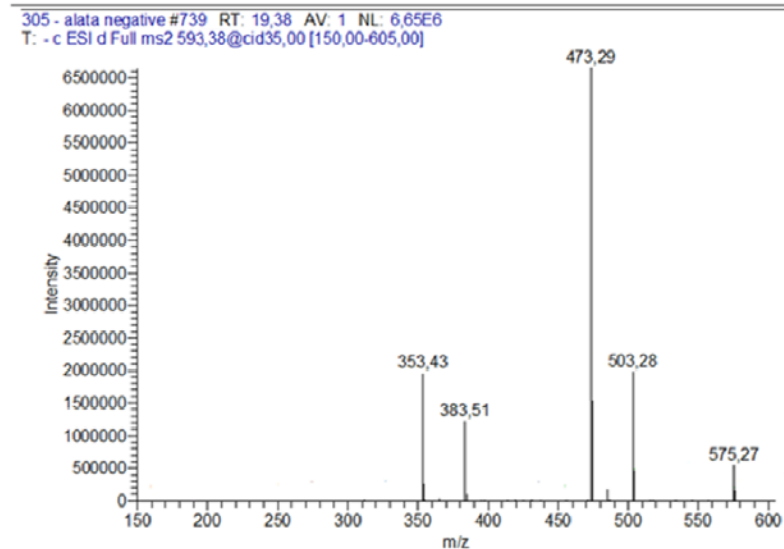

## Supplementary Figure 2. ESI-MS/MS profiles of identified compounds-Continued

### Quercetin-3-O-galactoside at [M - H]<sup>-</sup> 463

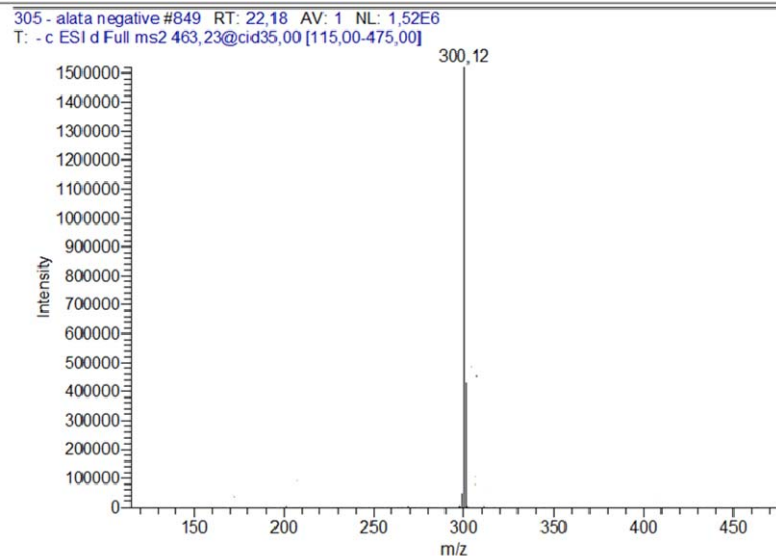

### Isoorientin-4 -O-glucoside at [M - H]<sup>-</sup> 609

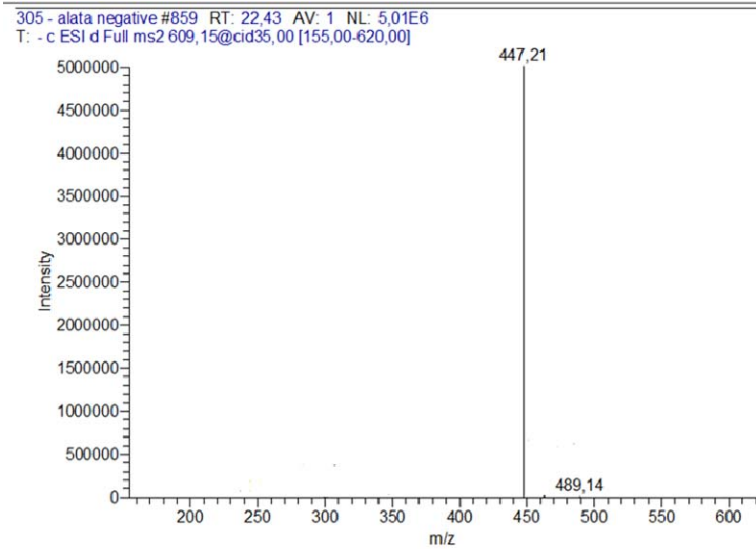

### 6-Hydroxyquercetin-3-O-di-hexose at [M - H]<sup>-</sup> 641

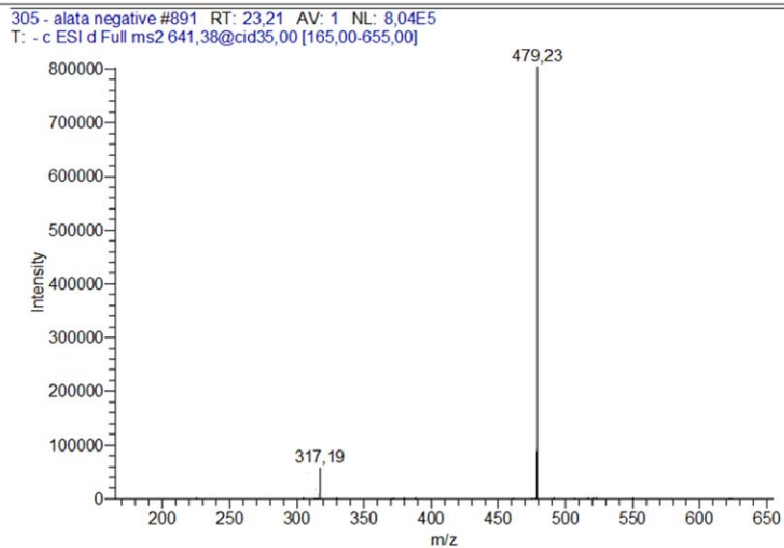

### Quercetin 3-O-glucoside at [M - H]<sup>-</sup> 463

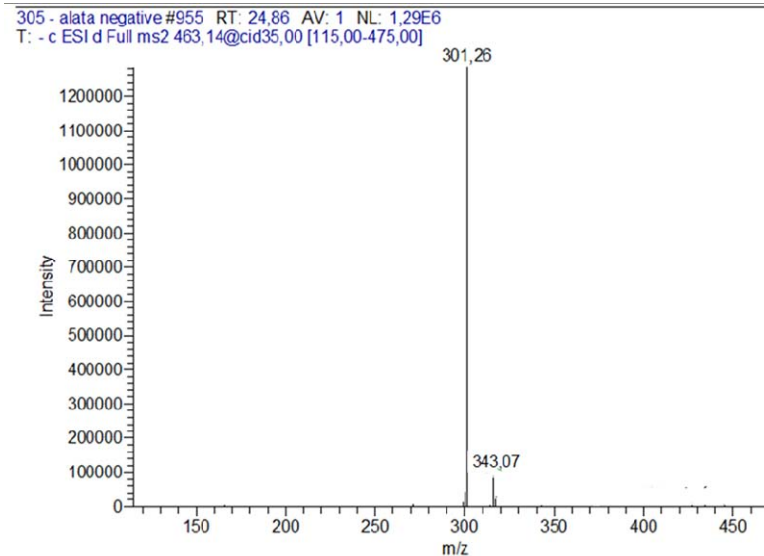

## Supplementary Figure 2. ESI-MS/MS profiles of identified compounds-Continued

### Luteolin-8-C- $\beta$ -D-glucopyranoside at [M - H]<sup>-</sup> 447

305 - Copie Meoh alata neg #989 RT: 25,74 AV: 1 NL: 1,22E6  
T: - c ESI d Full ms2 447,23@cid35,00 [110,00-460,00]

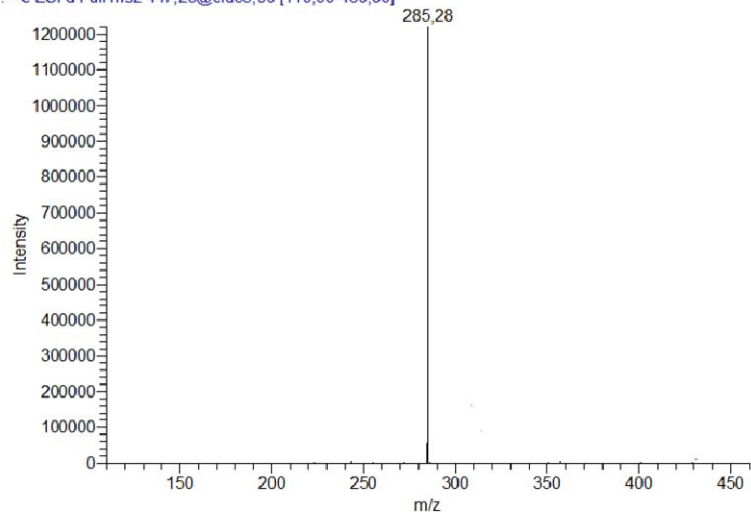

### Quercetin at [M - H]<sup>-</sup> 301

305 - alata negative #1027 RT: 26,65 AV: 1 NL: 1,13E6  
T: - c ESI d Full ms2 301,27@cid35,00 [70,00-315,00]

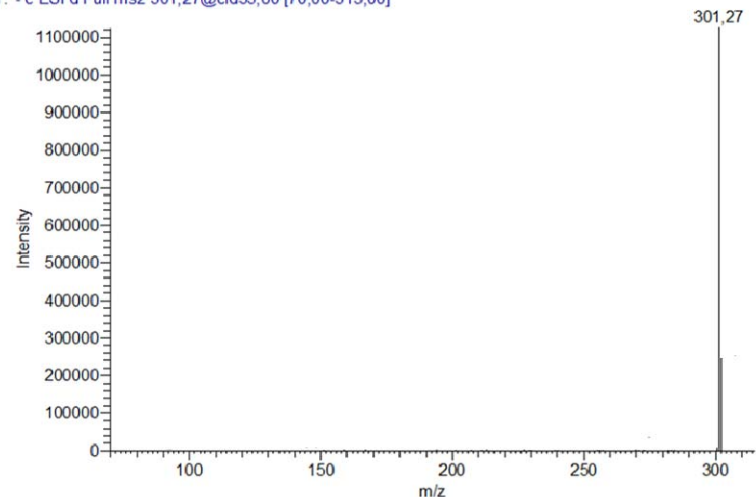

### Myricetin-3-O-glucoside at [M - H]<sup>-</sup> 479

305 - alata negative #1139 RT: 29,43 AV: 1 NL: 2,15E6  
T: - c ESI d Full ms2 479,18@cid35,00 [120,00-490,00]

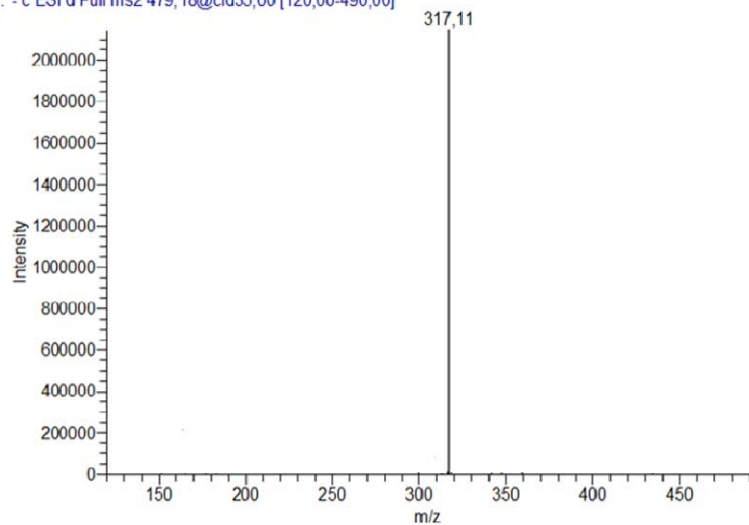

### Quercetin 3-O-[6''-(3-hydroxyl-3-methylglutaryl)- $\beta$ -D-galactoside] at [M - H]<sup>-</sup> 607

305 - alata negative #1181 RT: 30,46 AV: 1 NL: 3,07E7  
T: - c ESI d Full ms2 607,14@cid35,00 [155,00-620,00]

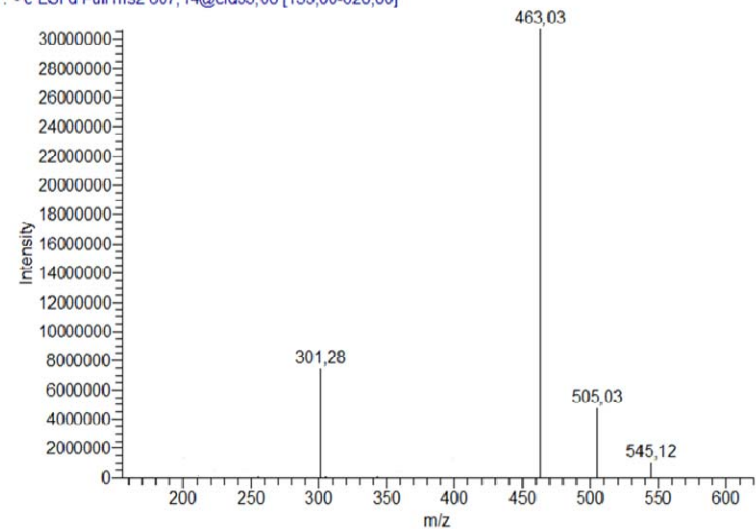

## Supplementary Figure 2. ESI-MS/MS profiles of identified compounds-Continued

Quercetin 3-*O*-rhamnoside 7-*O*-rhamnoside at [M - H]<sup>-</sup> 479

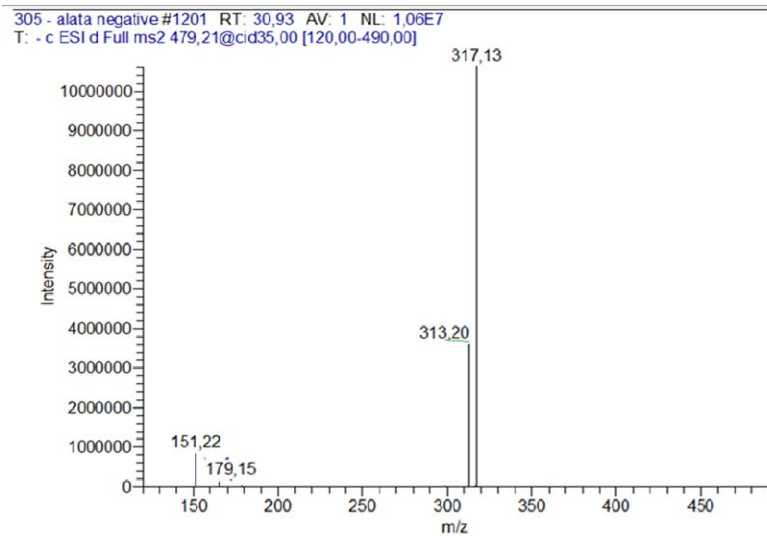

Unknown at [M - H]<sup>-</sup> 756

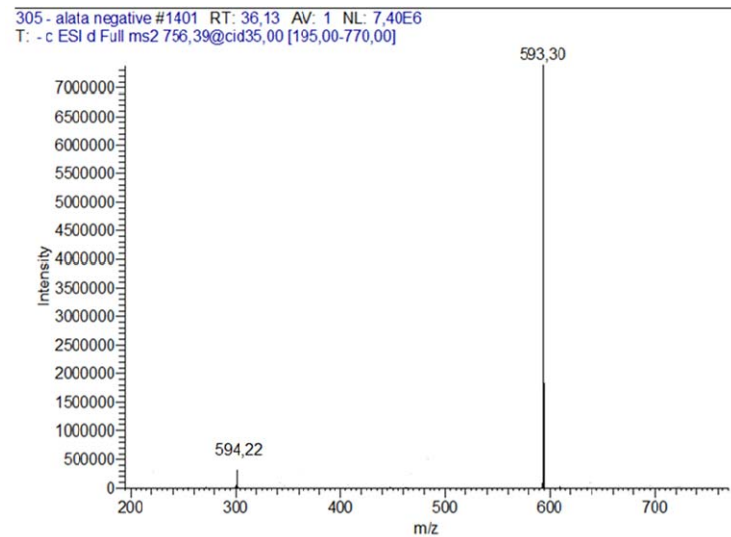

Quercetin 3-*O*-rhamnoside 7-*O*-rhamnoside at [M - H]<sup>-</sup> 593

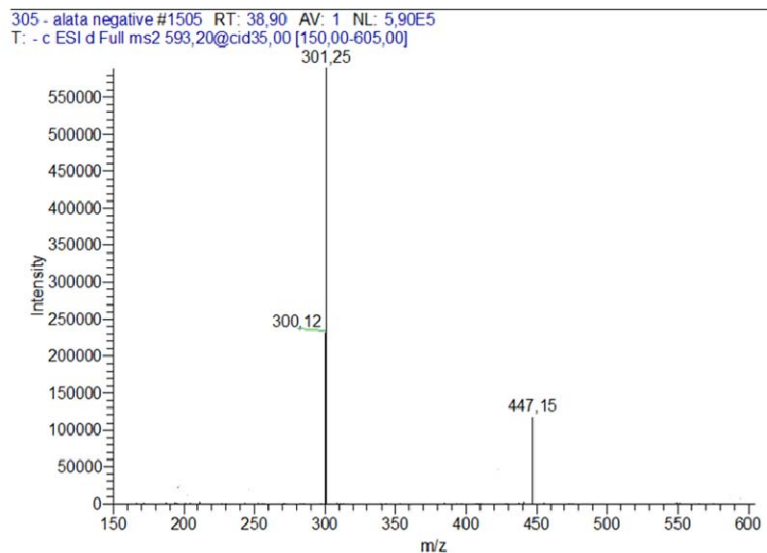

Kaempferol-*O*-di-deoxyhexoside at [M - H]<sup>-</sup> 577

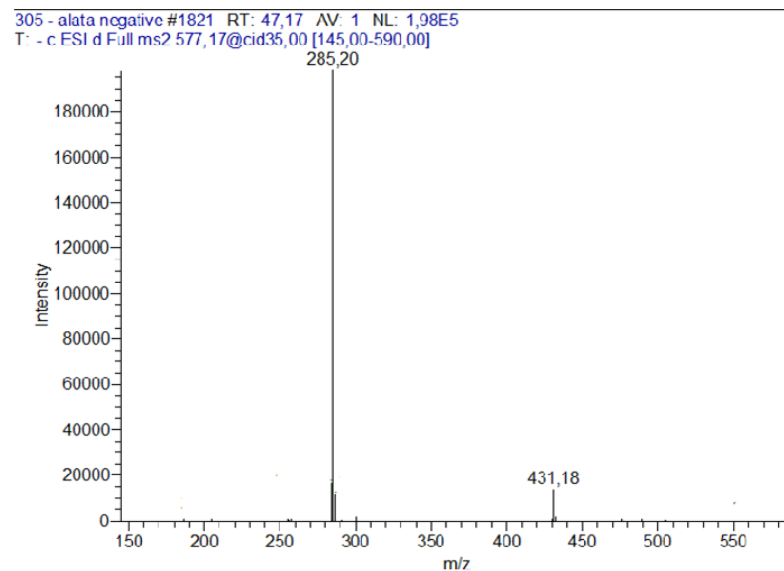

Supplement: cells-09-00362-s001.pdf [file cells-09-00362-s001.pdf]
